# Supplementary material
Source: PubMed Central journal article supplement (PMC379270)
Supplement: mbc_15_4_1724__1.pdf [file mbc_15_4_1724__1.pdf]

## Supplemental Figure 1

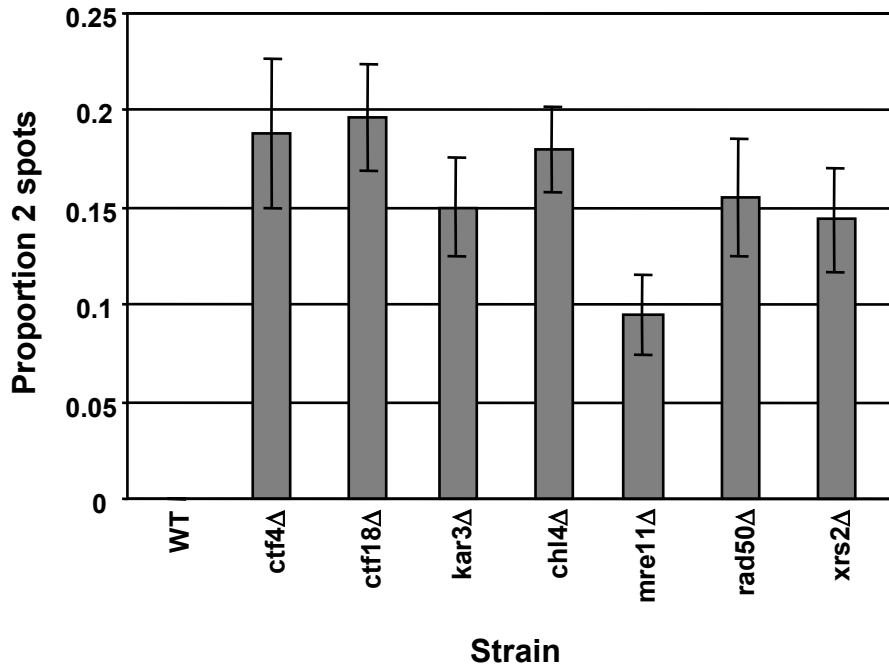

**Supplemental Figure 1.** Cohesion defects measured in Pds1-positive metaphase arrested cells. NatMX null alleles were introduced into YBS1045 (MATa ade2 trp1 his3 leu2::[LEU2tetR-GFP] ura3::[3xURA3tetO112] PDS1-13MYC::TRP1, Kenna and Skibbens, 2003) by transformation. Logarithmically growing cells were arrested in alpha factor, released into nocodazole, and fixed in formaldehyde. Cells were spheroplasted and immunostained to visualize the presence of myc-tagged Pds1 protein in arrested nuclei. Singly budded cells containing Pds1 positive nuclei were scored as having one or two spots. At least 100 cells were counted for each strain. The frequency of 2 spot cells in each mutant was significantly different ( $p < 0.000001$ , Fisher's exact test) from wild type, for which the number of 2 spot cells was zero (N = 170).
